# Supplementary material for: 90-Day Patient-Centered Outcomes after Totally Endoscopic Cardiac Surgery: A Prospective Cohort Study
Source: MDPI journal article supplement (doi:10.3390/jcm11092674), 2022-05-09
Supplement: s1 [file s1]

## Supplementary

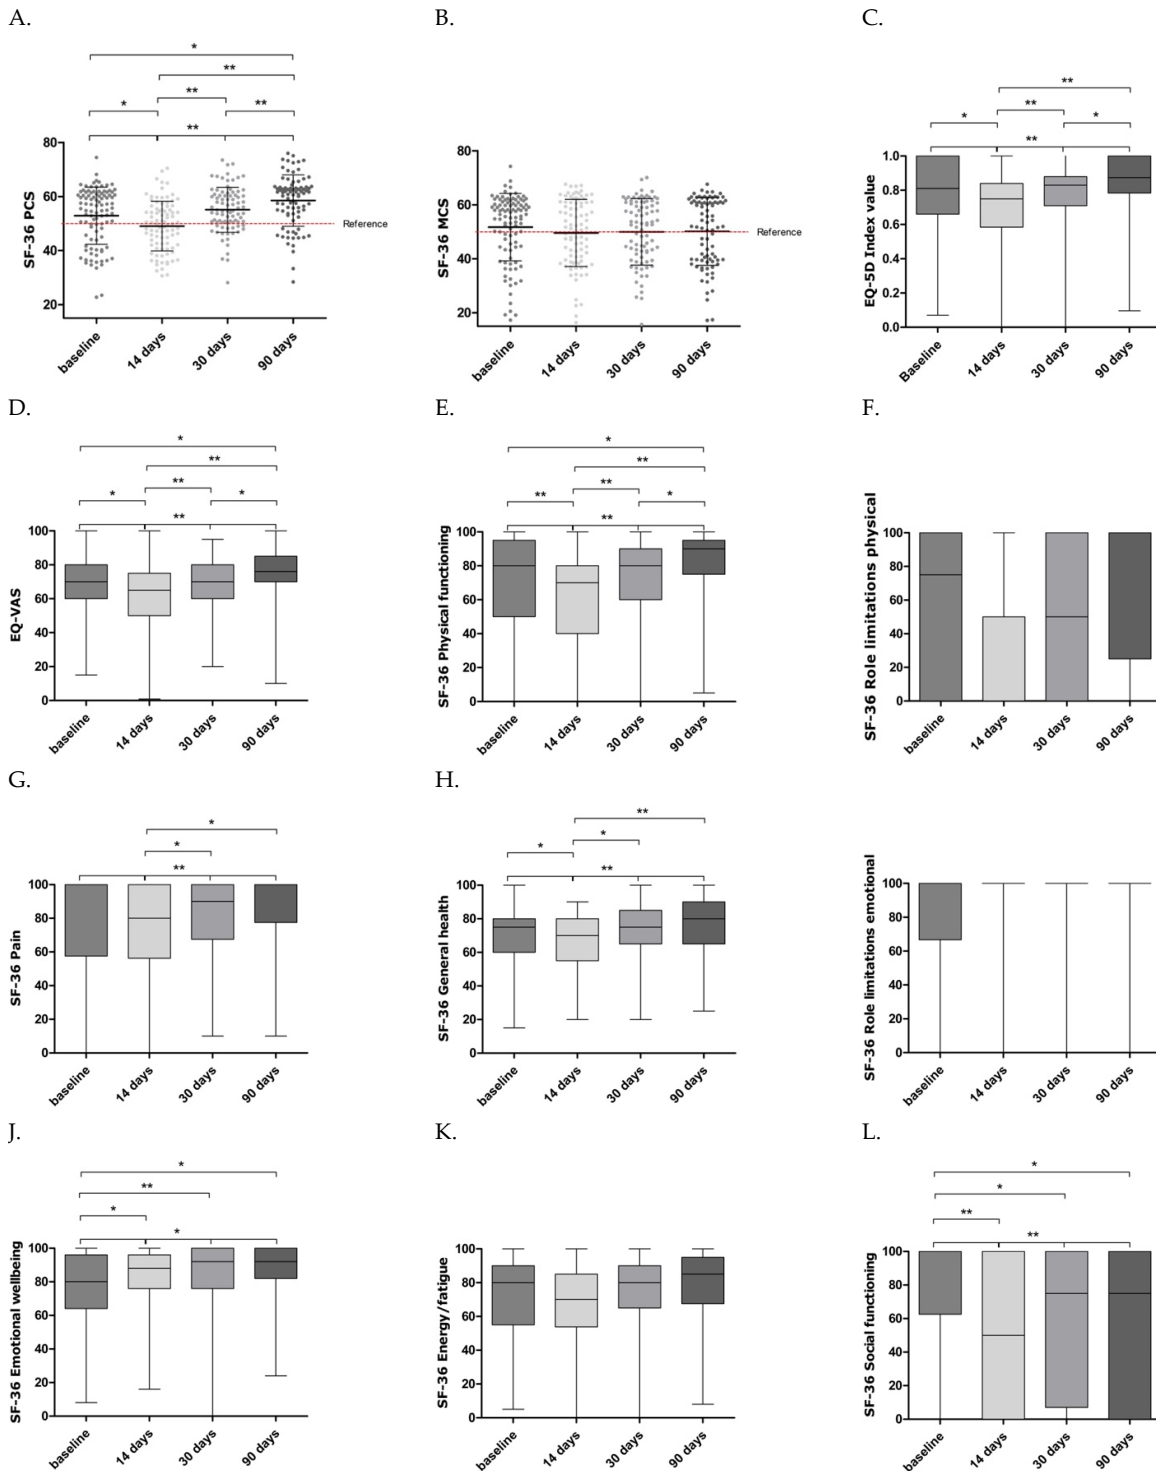

**Supplementary Figure S1: Different domains of the short form 36 (SF-36) and Euro Quality of Life 5 dimensions (EQ-5D) questionnaires after endoscopic coronary artery bypass grafting.** Data are shown as median and interquartile ranges.

Significance is tested with the Friedman and Wilcoxon Signed Rank test with Bonferroni correction and is indicated as \*:  $p < 0.05$ ; \*\*:  $p < 0.001$ . MCS: mental component score, PCS: physical component score, VAS: visual analogue score.

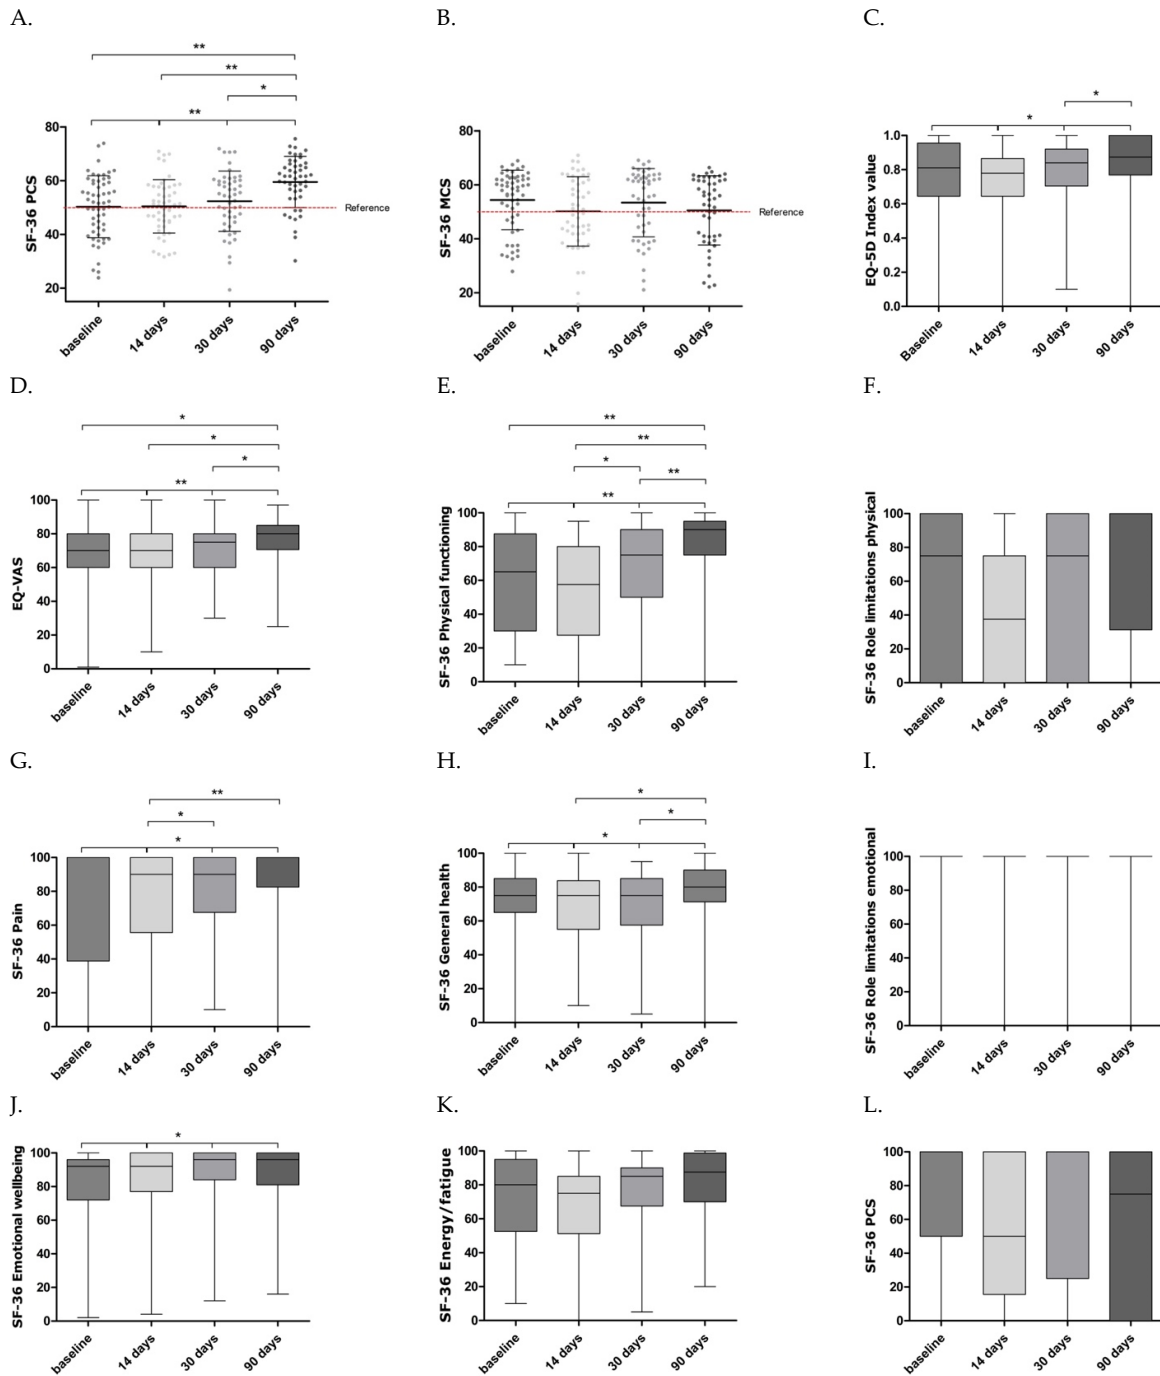

**Supplementary Figure S2: Different domains of the short form 36 (SF-36) and Euro Quality of Life 5 dimensions (EQ-5D) questionnaires after endoscopic aortic valve replacement.** Data are shown as median and interquartile ranges. Significance is tested with the Friedman and Wilcoxon Signed Rank test with Bonferroni correction and is indicated as \*:  $p < 0.05$ ; \*\*:  $p < 0.001$ . MCS: mental component score, PCS: physical component score, VAS: visual analogue score.

**Supplementary Table S1: Recovery after 30-days and improvement after 90-days.**

|                | <b>TECS</b><br>(n=193) | <b>Endo-CABG</b><br>(n=99) | <b>Open CABG</b><br>(n=8) | <b>Yil-AVR</b><br>(n=57) | <b>TAVI</b><br>(n=8) | <b>MVATS</b><br>(n=16) | <b>Combination</b><br>(n=23) |
|----------------|------------------------|----------------------------|---------------------------|--------------------------|----------------------|------------------------|------------------------------|
| <b>30-days</b> |                        |                            |                           |                          |                      |                        |                              |
| Not recovered  | 87 (45.01)             | 38 (38.38)                 | 6 (75.00)                 | 23 (40.35)               | 3 (37.50)            | 5 (31.25)              | 13 (56.52)                   |
| Recovered      | 100 (51.81)            | 50 (50.50)                 | 2 (25.00)                 | 28 (49.12)               | 5 (62.50)            | 9 (56.25)              | 7 (30.43)                    |
| Improved       | 64 (33.16)             | 31 (31.31)                 | 1 (12.50)                 | 18 (31.58)               | 5 (62.50)            | 6 (37.50)              | 4 (17.39)                    |
| <b>90-days</b> |                        |                            |                           |                          |                      |                        |                              |
| Not recovered  | 54 (27.98)             | 30 (30.30)                 | 4 (50.00)                 | 13 (22.81)               | 2 (25.00)            | 5 (31.25)              | 2 (8.70)                     |
| Recovered      | 124 (64.25)            | 57 (57.57)                 | 4 (50.00)                 | 37 (64.91)               | 6 (75.00)            | 9 (56.25)              | 13 (56.52)                   |
| Improved       | 88 (45.60)             | 42 (42.42)                 | 2 (25.00)                 | 24 (44.11)               | 3 (37.50)            | 7 (43.75)              | 11 (47.83)                   |

CABG: coronary artery bypass grafting; Endo-CABG: endoscopic coronary artery bypass grafting; MVATS: mitral valve repair or replacement through video-assisted thoracoscopic surgery; TAVI: transcatheter aortic valve implantation.; TECS: totally endoscopic cardiac surgery; Yil-AVR: endoscopic aortic valve replacement.

**Supplementary Table S2: Univariate factors tested for correlation with 30-day recovery and 90 day improvement.**

|                                                             | <b>Coefficient</b> | <b>SE</b> | <b>OR</b> | <b>95% CI</b> | <b>P-value</b> |
|-------------------------------------------------------------|--------------------|-----------|-----------|---------------|----------------|
| <b>A. Univariate factors tested with 30-day recovery</b>    |                    |           |           |               |                |
| <b>Age</b>                                                  | -0.040             | 0.018     | 0.960     | 0.928 – 0.994 | <b>0.021</b>   |
| <b>CPB time</b>                                             | -0.009             | 0.004     | 0.991     | 0.983 – 0.999 | <b>0.022</b>   |
| <b>AHT</b>                                                  | -0.711             | 0.341     | 0.491     | 0.252 – 0.958 | <b>0.037</b>   |
| <b>Smoking</b>                                              | -                  | -         | -         | -             | <b>0.048</b>   |
| <b>Euroscore II</b>                                         | 0.167              | 0.085     | 0.849     | 0.719 – 1.002 | <b>0.053</b>   |
| <b>ICU LOS</b>                                              | -0.006             | 0.003     | 0.994     | 0.988 – 1.000 | <b>0.052</b>   |
| <b>Hospital LOS</b>                                         | -0.071             | 0.038     | 0.931     | 0.864 – 1.004 | <b>0.062</b>   |
| <b>Education</b>                                            | -                  | -         | -         | -             | <b>0.075</b>   |
| <b>Combinations</b>                                         | -0.879             | 0.497     | 0.415     | 0.157 – 1.101 | <b>0.077</b>   |
| <b>Clamping time</b>                                        | -0.008             | 0.005     | 0.992     | 0.982 – 1.001 | <b>0.091</b>   |
| Transfusion packed cells                                    | -0.681             | 0.511     | 0.506     | 0.186 – 1.377 | 0.182          |
| Revision <48h                                               | -0.700             | 0.747     | 0.497     | 0.115 – 2.149 | 0.349          |
| Gender                                                      | 0.327              | 0.368     | 0.721     | 0.350 – 1.48  | 0.375          |
| EQ-5D Pain at 14 days                                       | -                  | -         | -         | -             | 0.534          |
| Bleeding 24h                                                | 0.000              | 0.000     | 1.274     | 0.999 – 1.000 | 0.590          |
| Diabetes mellitus                                           | -                  | -         | -         | -             | 0.801          |
| BMI                                                         | 0.007              | 0.037     | 0.993     | 0.923 – 1.068 | 0.849          |
| Revision < 1 week                                           | 21.412             | 20096.49  | 0.000     | 0.000 – 0.000 | 0.999          |
| Neurological complications                                  | -                  | -         | -         | -             | 1.000          |
| <b>B. Univariate factors tested with 90-day improvement</b> |                    |           |           |               |                |
| <b>BMI</b>                                                  | 0.073              | 1.064     | 0.127     | 0.997 – 1.159 | <b>0.059</b>   |
| <b>Hospital LOS</b>                                         | -0.076             | 0.042     | 0.927     | 0.854 – 1.006 | <b>0.070</b>   |
| <b>Clamping time</b>                                        | 0.008              | 0.005     | 1.008     | 0.999 – 1.018 | <b>0.094</b>   |
| Gender                                                      | -0.550             | 0.364     | 0.577     | 0.283 – 1.177 | 0.130          |
| Euroscore II                                                | -0.101             | 0.81      | 0.904     | 0.771 – 1.060 | 0.214          |
| ICU LOS                                                     | -0.002             | 0.002     | 0.998     | 0.994 – 1.001 | 0.217          |
| AHT                                                         | 0.383              | 0.332     | 1.467     | 0.766 – 2.812 | 0.248          |
| Bleeding 24h                                                | 0.000              | 0.000     | 1.000     | 1.000 – 1.001 | 0.325          |
| EQ-5D Pain at 14 days                                       | -                  | -         | -         | -             | 0.441          |
| CPB time                                                    | 0.003              | 0.004     | 1.003     | 0.995 – 1.010 | 0.482          |
| Transfusion packed cells                                    | 0.330              | 0.502     | 1.391     | 0.520 – 3.718 | 0.511          |
| Combinations                                                | 0.309              | 0.479     | 1.362     | 0.533 – 3.480 | 0.519          |
| Diabetes mellitus                                           | -                  | -         | -         | -             | 0.525          |
| Revision < 1 week                                           | 1.050              | 1.165     | 0.350     | 0.036 – 3.435 | 0.755          |
| Education                                                   | -                  | -         | -         | -             | 0.808          |
| Smoking                                                     | -                  | -         | -         | -             | 0.818          |
| Age                                                         | 0.003              | 0.017     | 1.003     | 0.971 – 1.036 | 0.848          |
| Revision <48h                                               | 0.075              | 0.725     | 1.078     | 0.261 – 4.460 | 0.918          |
| Neurological complications                                  | -                  | -         | -         | -             | 1.000          |

AHT: arterial hypertension; BMI: body mass index; CPB: cardiopulmonary bypass; Euroscore II: European System for Cardiac Operative Risk Evaluation; EQ-5D: Euro Quality of Life 5 dimensions; ICU: intensive care unit; LOS: length of stay
